# Supplementary material
Source: publisher figshare collection journal article supplement (https://acs.figshare.com/ndownloader/files/21855444)
Supplement: Supplementary file 1 [file 21855444]

# **Synthesis of High Stability Nanosized Pt Loaded MgAl<sub>2</sub>O<sub>4</sub> Catalyst for *n*-decane Cracking with Enhanced Activity and Durability**

Yi Jiao<sup>a,\*</sup>, Ting Chen<sup>b</sup>, Linlin Wang<sup>b</sup>, Peng Yao<sup>a</sup>, Jun Zhang<sup>b</sup>, Yusheng Chen<sup>c</sup>, Yaoqiang Chen<sup>c</sup> and Jianli Wang<sup>c</sup>

*<sup>a</sup>Institute of New Energy and Low-Carbon Technology, Sichuan University, Chengdu 610064, Sichuan, China*

*<sup>b</sup>School of Chemical Engineering, Sichuan University, Chengdu 610064, Sichuan, China*

*<sup>c</sup>College of Chemistry, Sichuan University, Chengdu 610064, Sichuan, China*

\*E-mail: [jiaoyiscu@163.com](mailto:jiaoyiscu@163.com). Tel.: +86-028-85418451. Fax: +86-028-85418451 (Y.J.)

## Supporting Material

**Figure S1** *n*-decane conversion (a) and heat sink (b) over the PMA-V catalyst in this work, PNMLA catalyst in ref.27, MZTA catalyst in ref.24.

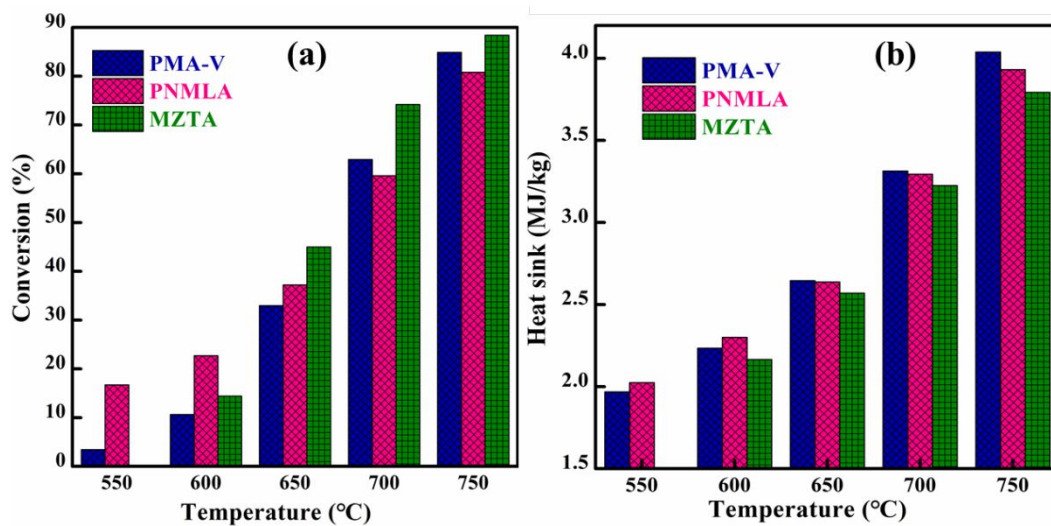

PNMLA = Pt-Ni/MoO<sub>3</sub>/La-Al<sub>2</sub>O<sub>3</sub>; MZTA = MoO<sub>3</sub>/ZrO<sub>2</sub>-TiO<sub>2</sub>-Al<sub>2</sub>O<sub>3</sub>

**Figure S2** Thermal stability over the PMA-V catalyst in this work and PNMLA catalyst

in ref.27

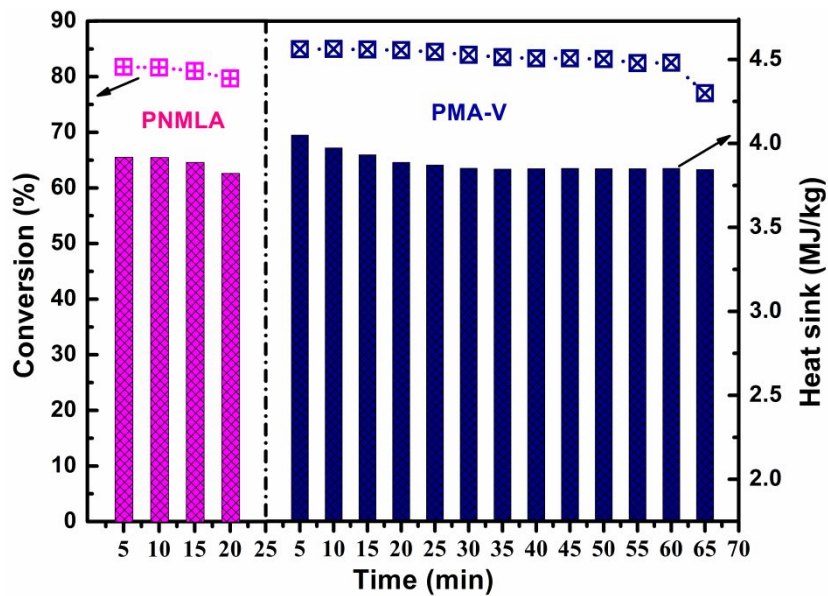

**Figure S3** HAADF-TEM EDS elemental mapping of PMA-V catalyst, (c) another section different from (b) in the manuscript of PMA-V micrographs

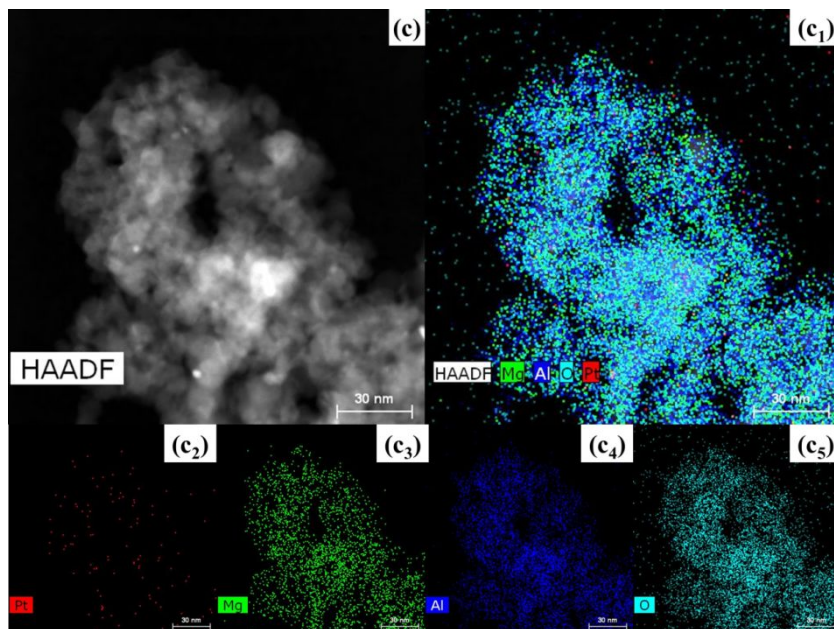

As shown in Figure S3, Pt species are uniformly dispersed on the MA surface, very few Pt species are sintered calcination at 800 °C.

**Table S1** The amount of carbon deposition over the PMA-V catalyst in this work, PNMLA catalyst in ref.27, MZTA catalyst in ref.24.

| Catalysts | Carbon deposition |                    |                           |
|-----------|-------------------|--------------------|---------------------------|
|           | mg                | mg/cm <sup>2</sup> | mg/(cm <sup>2</sup> •min) |
| PMA-V     | 169.2 (93min)     | 53.87              | 0.58                      |
| PNMLA     | 95.4 (28min)      | 19.08              | 0.68                      |
| MZTA      | 85.4 (28min)      | 17.07              | 0.61                      |

Obviously, the rate of coke formation over PMA-V catalysts is lower than that in PNMLA and MZTA catalysts <sup>24,27</sup>.

## References

- (24) Jiao, Y.; Zhang, H.; Li, S. S.; Guo, C. H.; Yao, P.; Wang, J. L. Impact of Acidity in ZrO<sub>2</sub>-TiO<sub>2</sub>-Al<sub>2</sub>O<sub>3</sub> Composite Oxides on the Catalytic Activity and Coking Behaviors during n-Decane Cracking. *Fuel* **2018**, *233*, 724.
- (27) Zhang, J.; Chen, T.; Yao, P.; Jiao, Y.; Wang, J. L.; Chen, Y. Q.; Zhu, Q.; Li, X. Y. Catalytic Cracking of n-Decane over Monometallic and Bimetallic Pt-Ni/MoO<sub>3</sub>/La-Al<sub>2</sub>O<sub>3</sub> Catalysts: Correlations of Surface Properties and Catalytic behaviors. *Ind. Eng. Chem. Res.* **2019**, *58*, 1823.
